# Supplementary material for: Study on pyroptosis-related genes Casp8, Gsdmd and Trem2 in mice with cerebral infarction
Source: PeerJ journal article supplement (doi:10.7717/peerj.16818), 2024-02-09
Supplement: Raw_data.zip [file Raw_data.zip]

# Volcano plot

EnhancedVolcano

● NS ●  $\text{Log}_2 \text{FC}$  ● p-value ● p-value and  $\text{log}_2 \text{FC}$

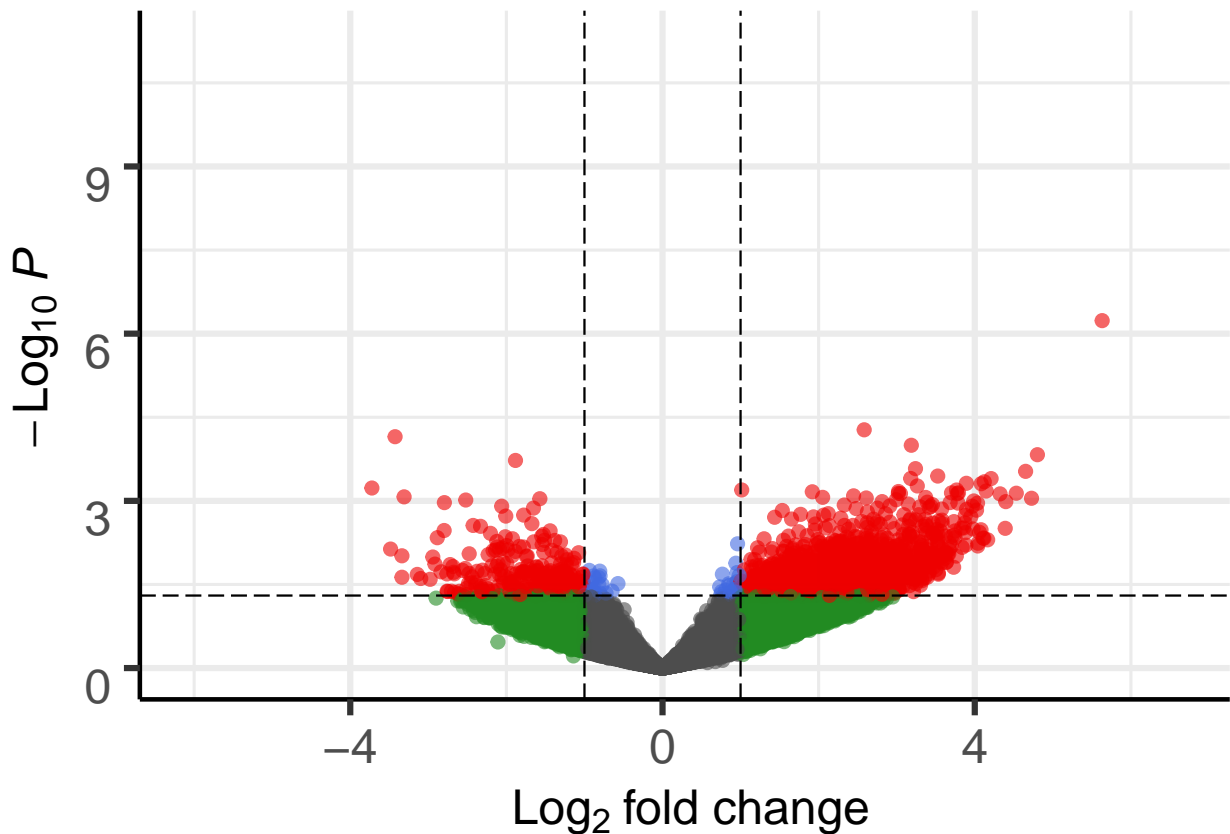

Total = 26984 variables
