# Supplementary material for: Study on pyroptosis-related genes Casp8, Gsdmd and Trem2 in mice with cerebral infarction
Source: PeerJ journal article supplement (doi:10.7717/peerj.16818), 2024-02-09
Supplement: Raw_data.zip [file Raw_data.zip]

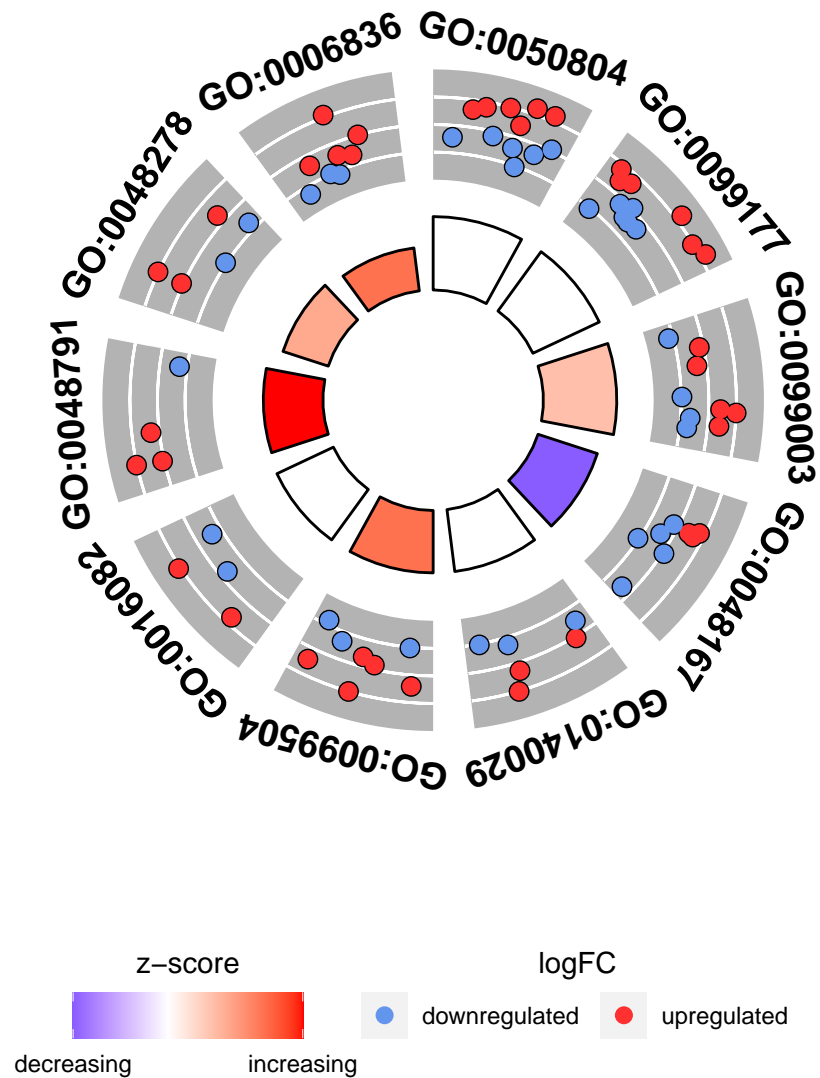

| ID         | Description                                          |
|------------|------------------------------------------------------|
| GO:0050804 | modulation of chemical synaptic transmission         |
| GO:0099177 | regulation of trans-synaptic signaling               |
| GO:0099003 | vesicle-mediated transport in synapse                |
| GO:0048167 | regulation of synaptic plasticity                    |
| GO:0140029 | exocytic process                                     |
| GO:0099504 | synaptic vesicle cycle                               |
| GO:0016082 | synaptic vesicle priming                             |
| GO:0048791 | calcium ion-regulated exocytosis of neurotransmitter |
| GO:0048278 | vesicle docking                                      |
| GO:0006836 | neurotransmitter transport                           |
