# Supplementary figures and images for: Study on pyroptosis-related genes Casp8, Gsdmd and Trem2 in mice with cerebral infarction
Source: PeerJ journal article supplement (doi:10.7717/peerj.16818), 2024-02-09

### Scale independence

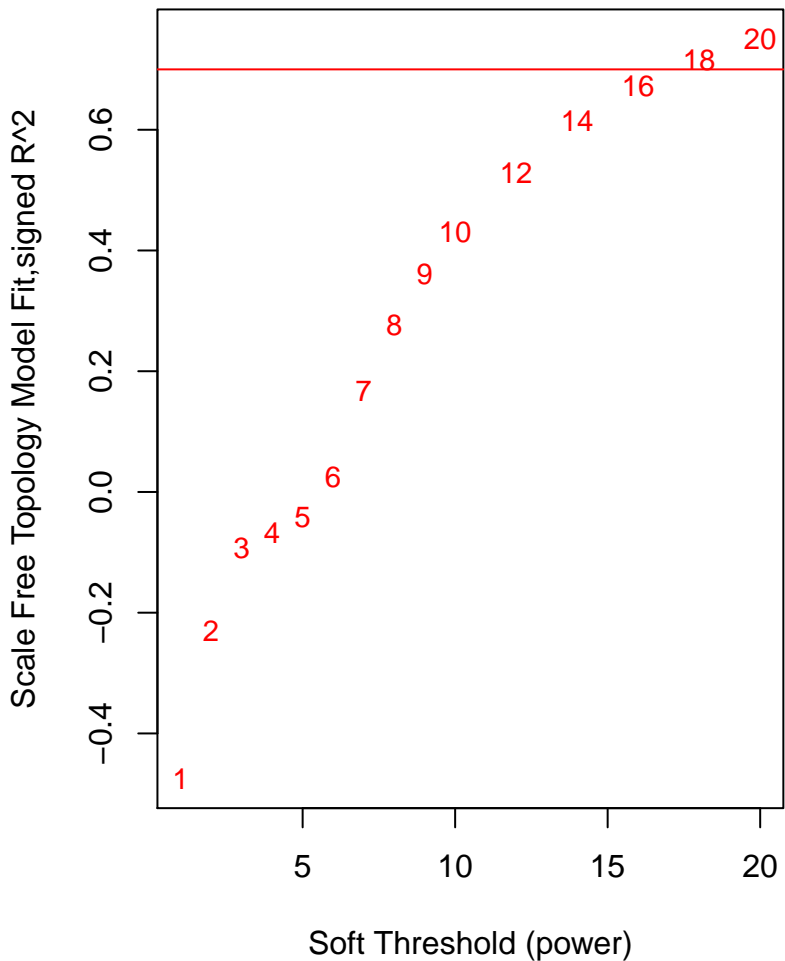

### Mean connectivity

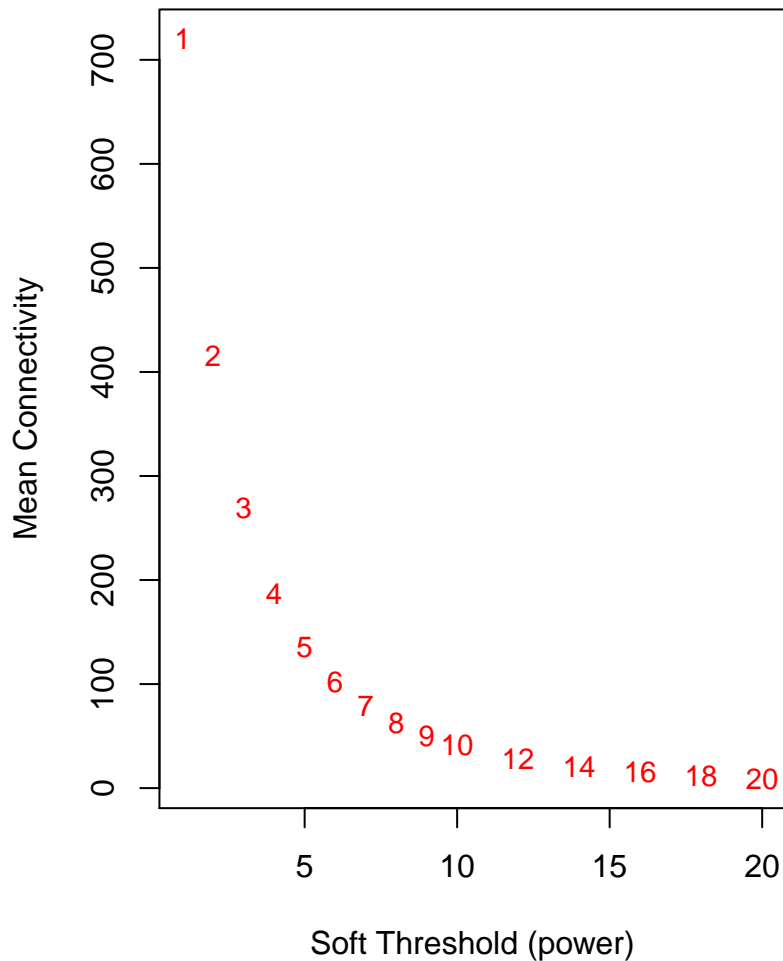

Supplement: Raw_data.zip [file Raw_data.zip]

UNC13A expression level

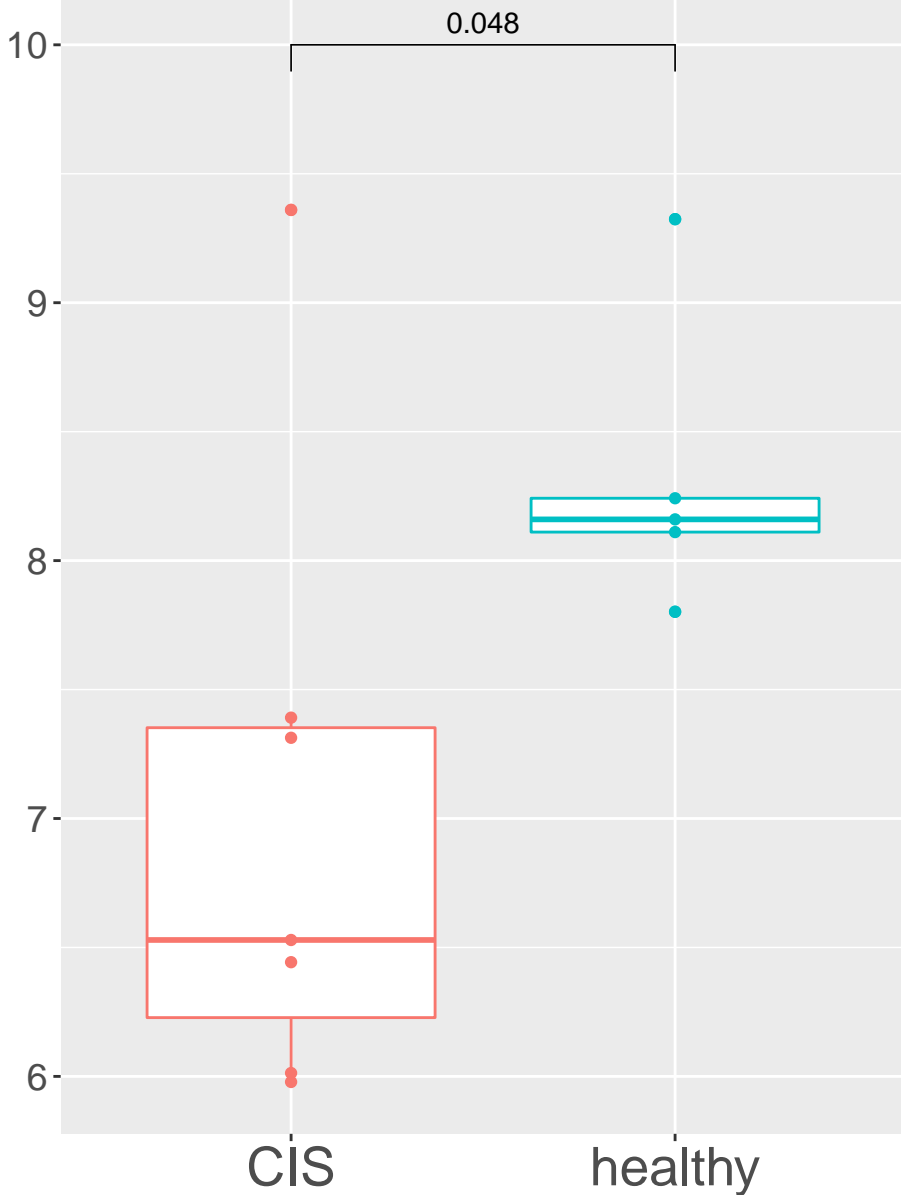

Tissue

CIS

healthy

Supplement: Raw_data.zip [file Raw_data.zip]

SNAP25 expression level

0.27

12

10

8

CIS

healthy

Tissue

CIS

healthy

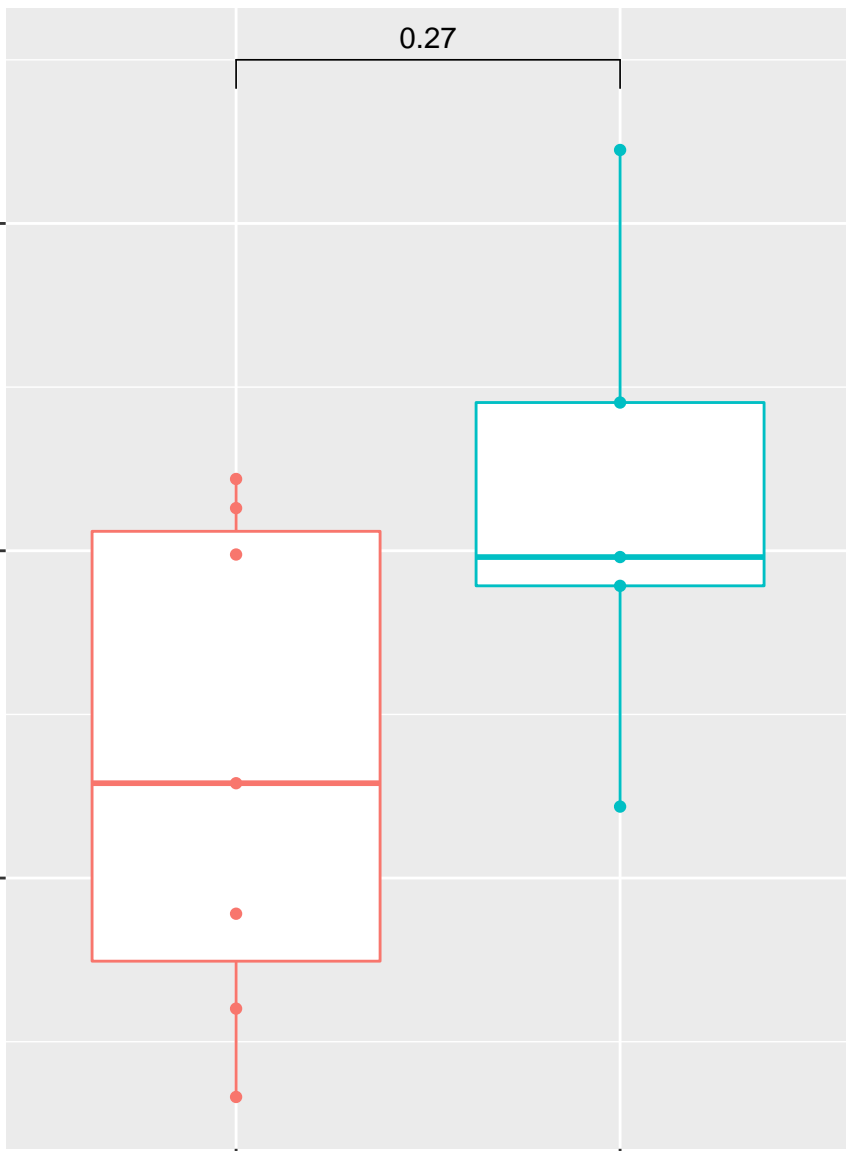

Supplement: Raw_data.zip [file Raw_data.zip]

# Sample clustering to detect outliers

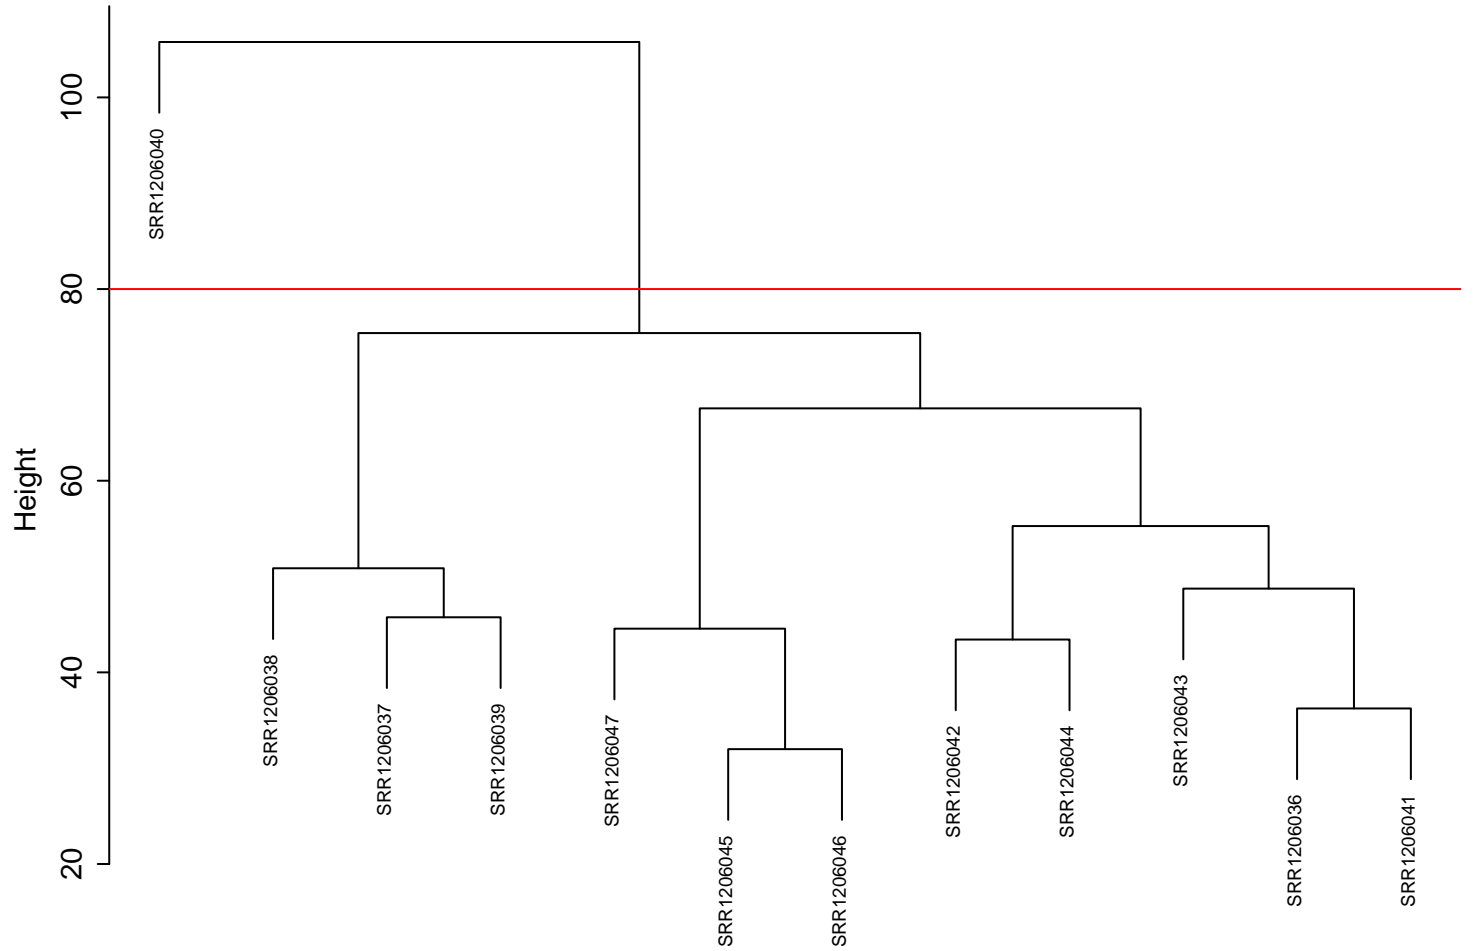

Supplement: Raw_data.zip [file Raw_data.zip]

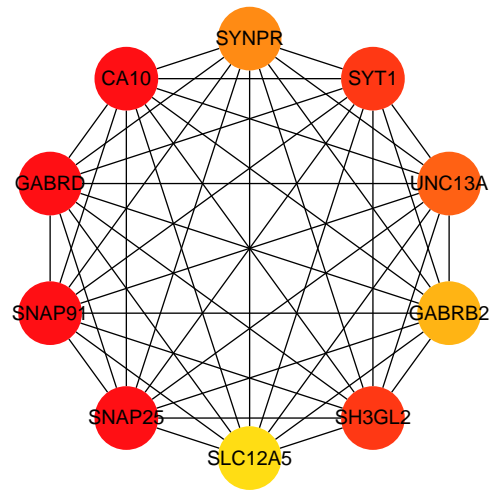

Supplement: Raw_data.zip [file Raw_data.zip]

# Cluster Dendrogram

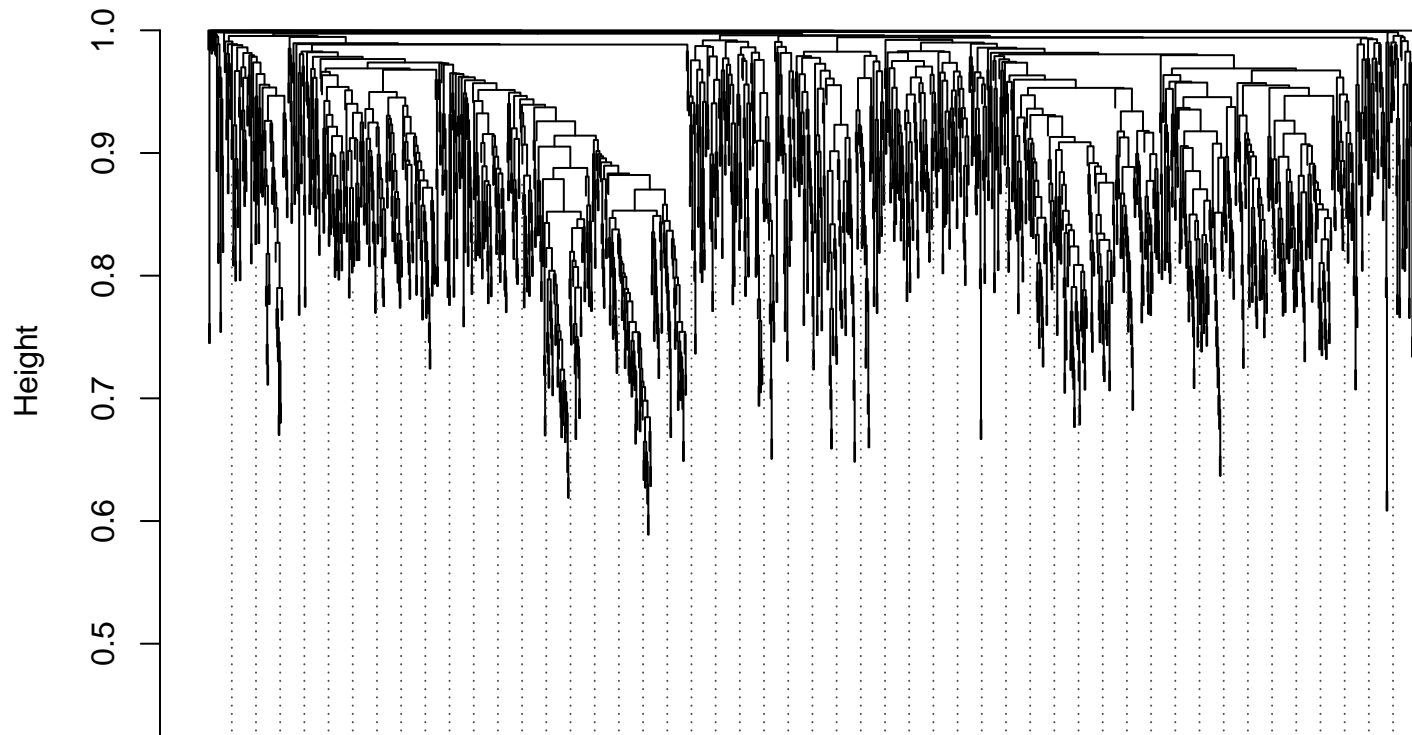

Dynamic Tree Cut

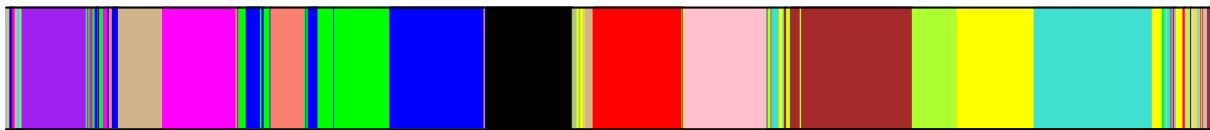

Merged dynamic

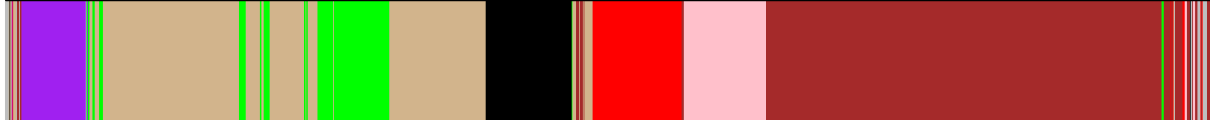

Supplement: Raw_data.zip [file Raw_data.zip]

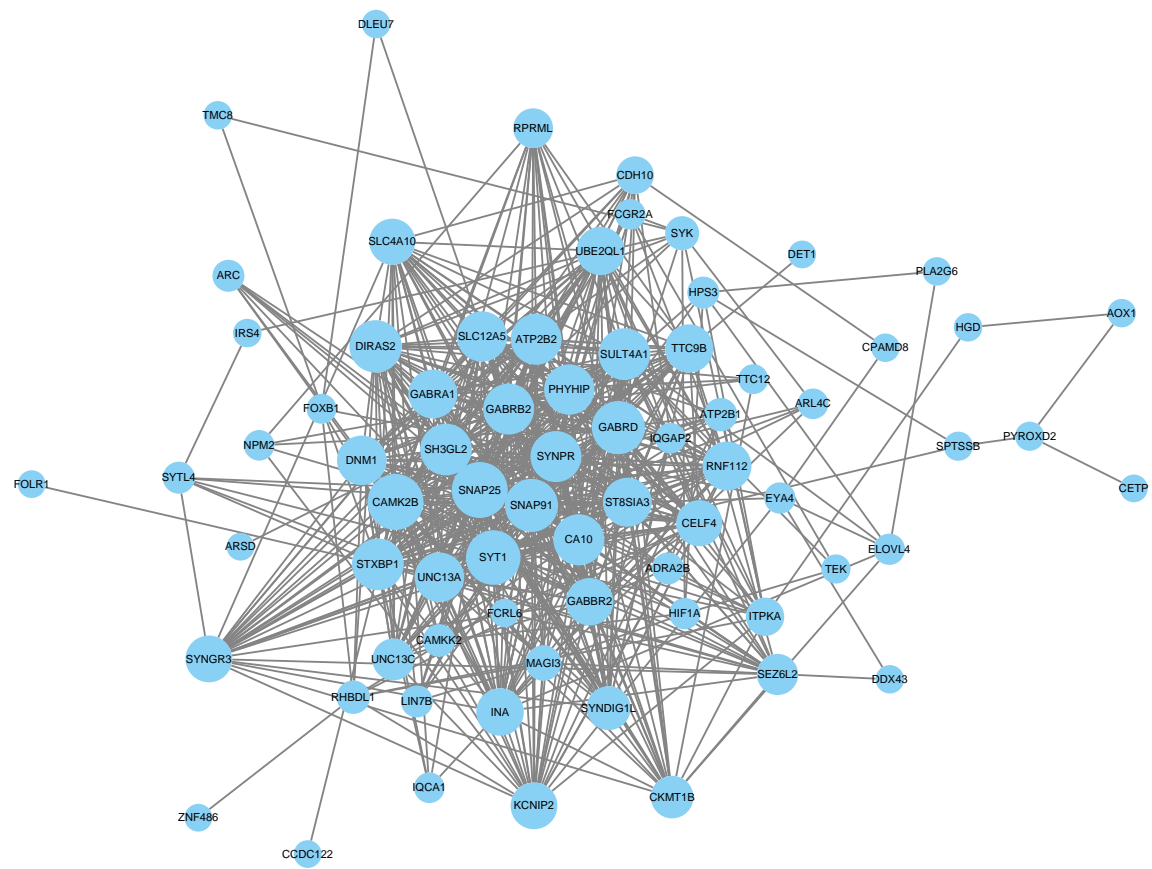

Supplement: Raw_data.zip [file Raw_data.zip]

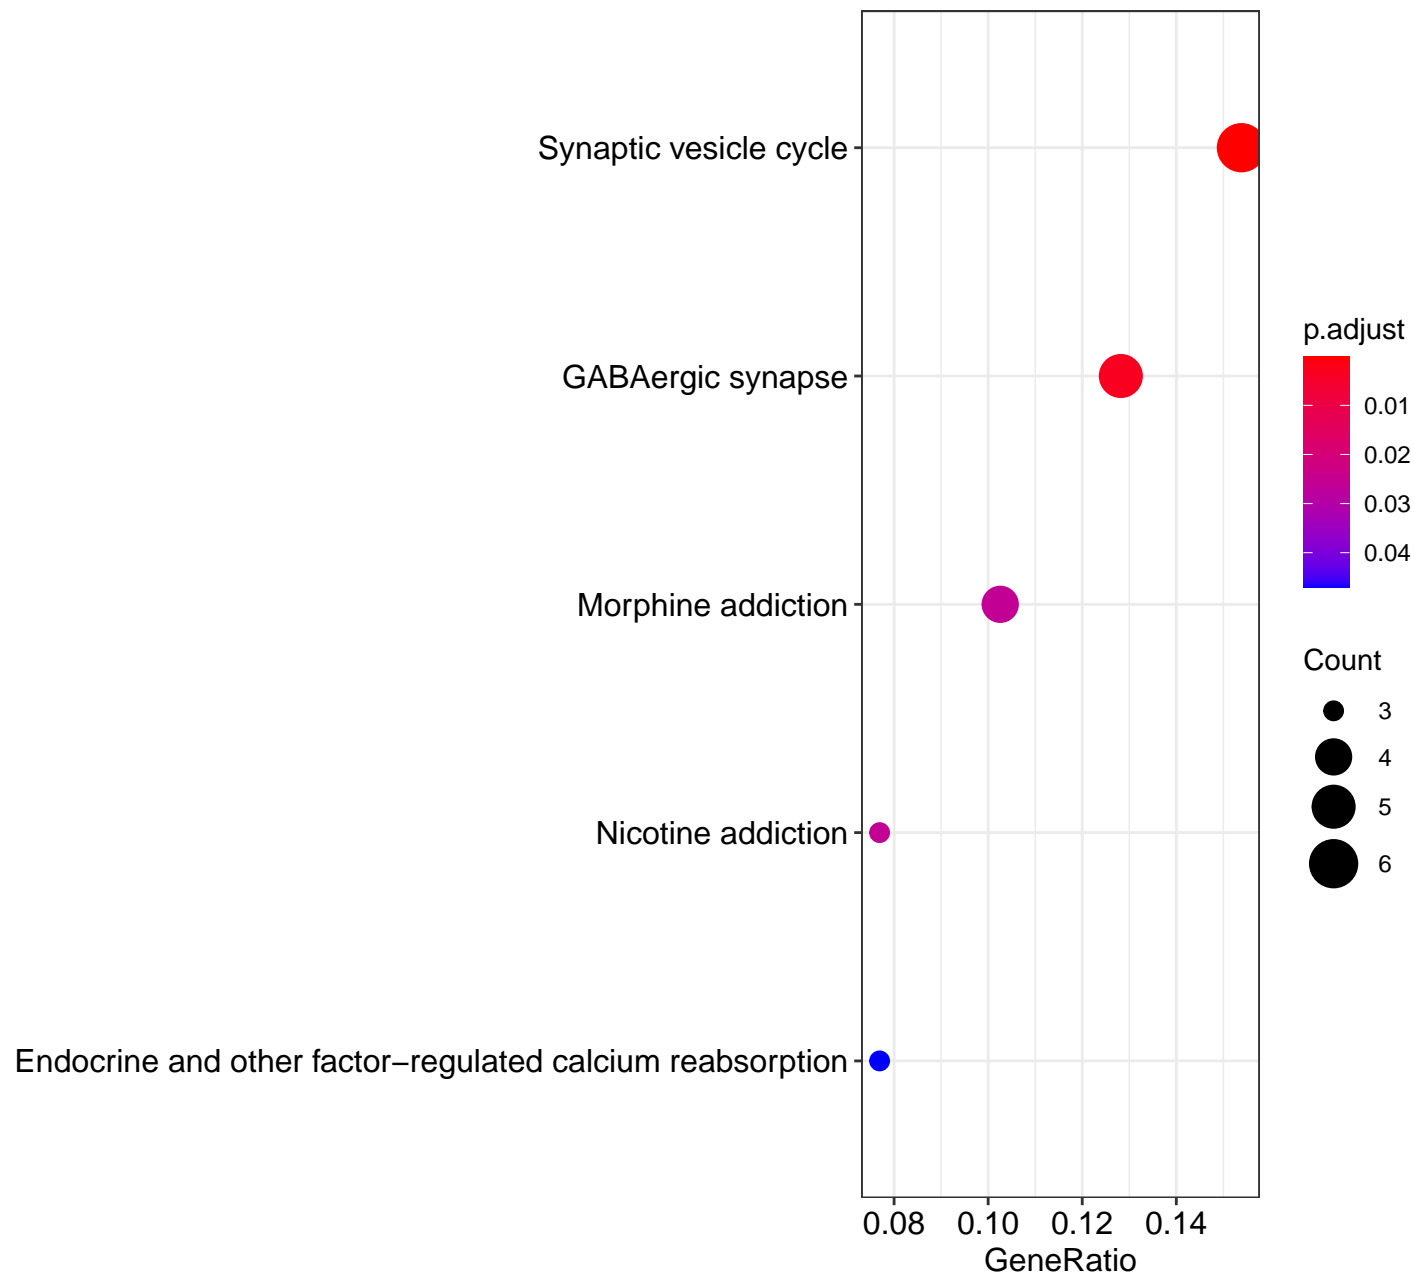

Supplement: Raw_data.zip [file Raw_data.zip]

SYT1 expression level

0.018

10

8

6

CIS

healthy

Tissue

CIS

healthy

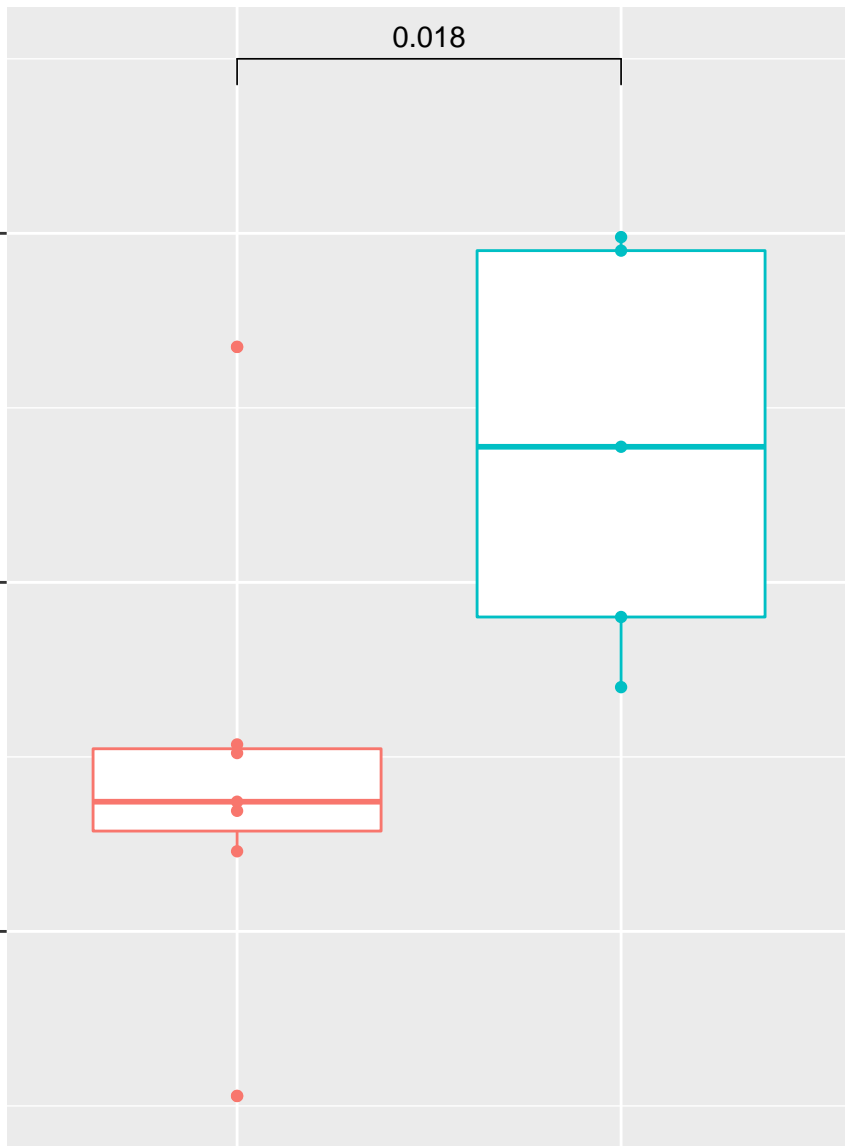

Supplement: Raw_data.zip [file Raw_data.zip]

# Module-trait relationships

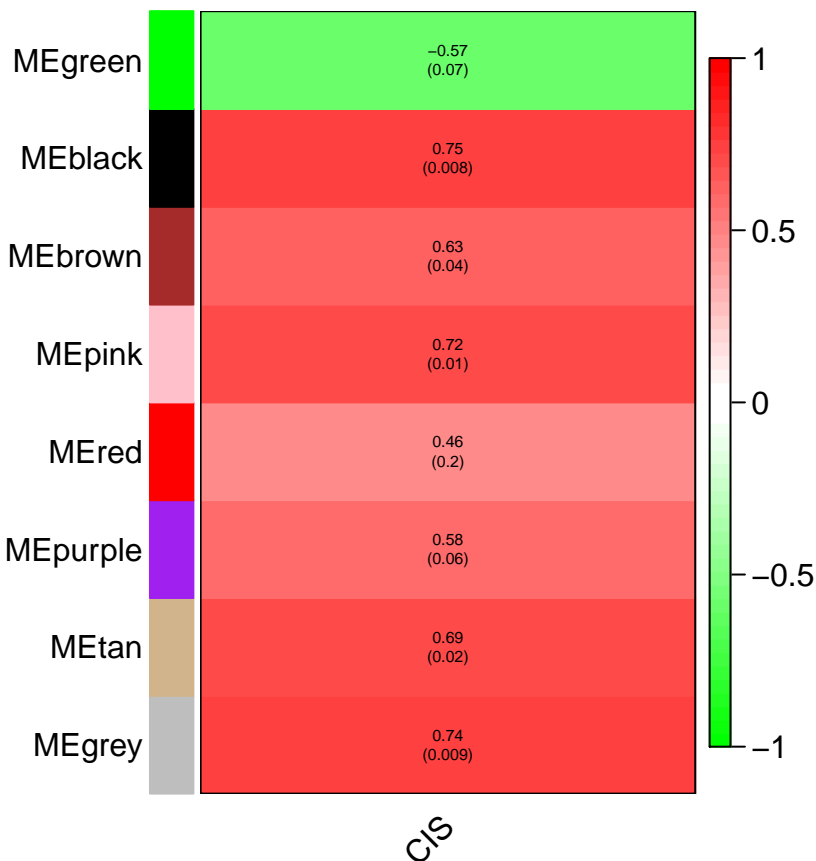

Supplement: Raw_data.zip [file Raw_data.zip]

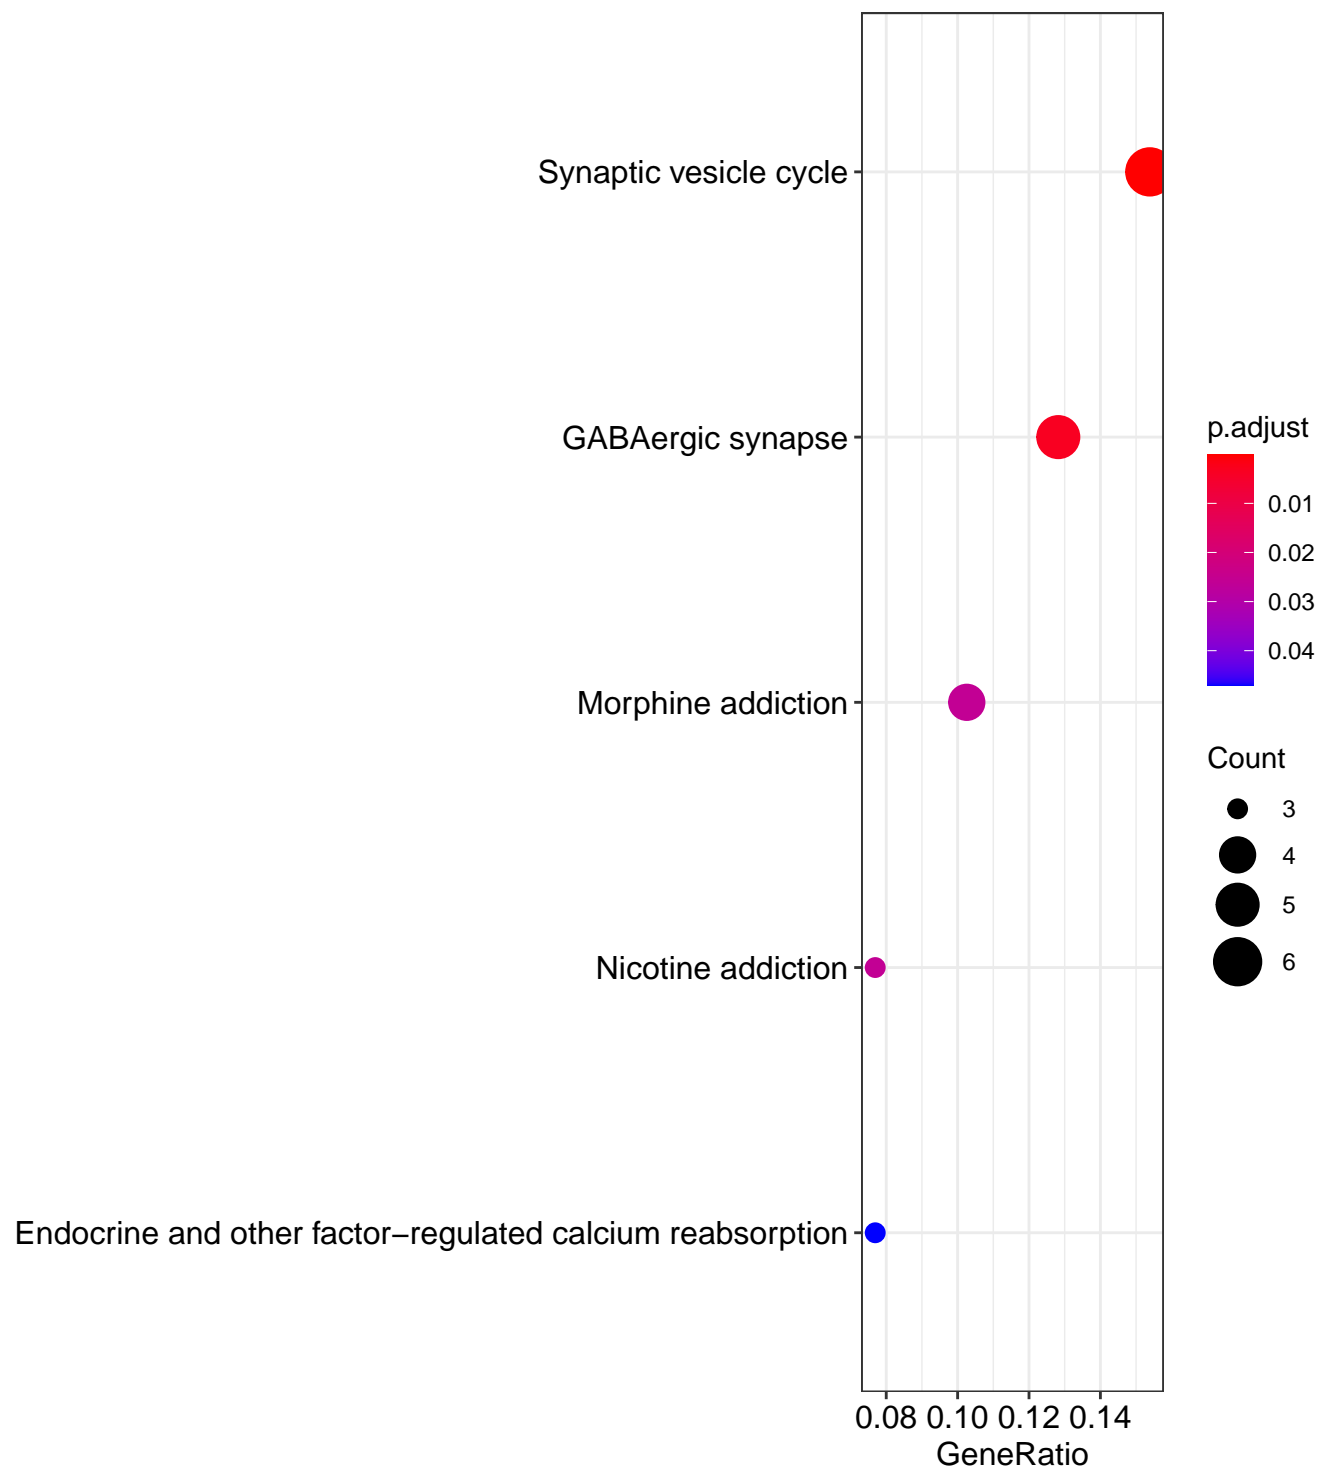

Supplement: Raw_data.zip [file Raw_data.zip]

### Scale independence

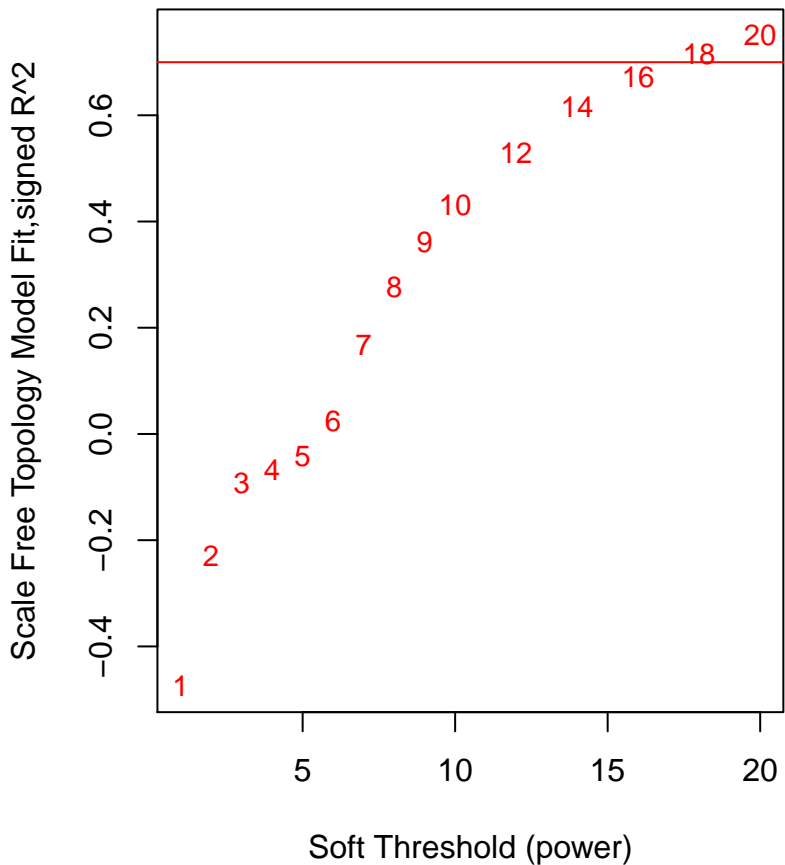

### Mean connectivity

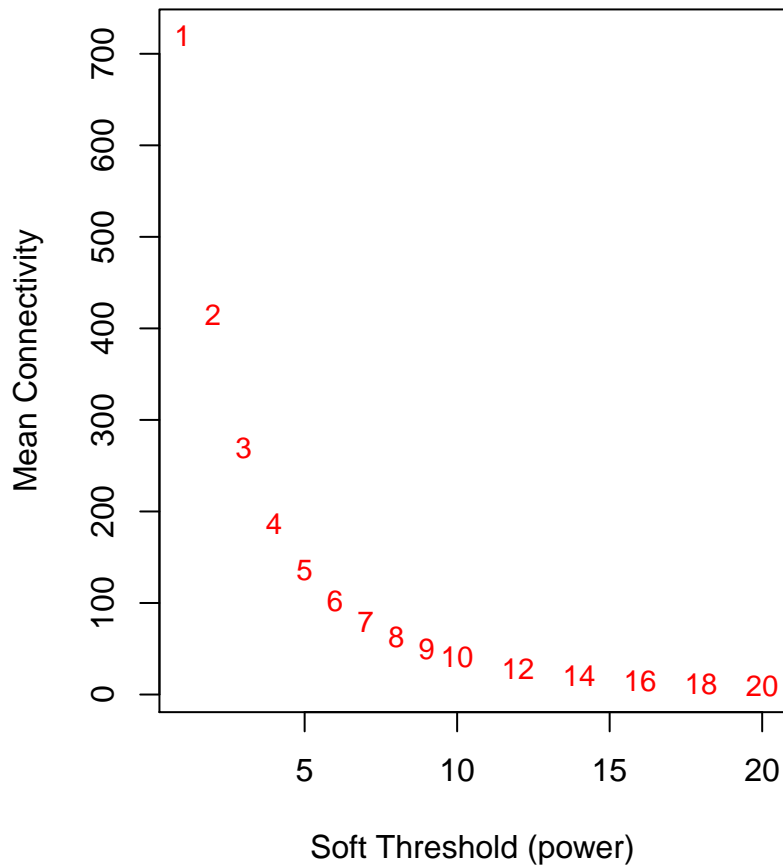

Supplement: Raw_data.zip [file Raw_data.zip]

# Sample clustering to detect outliers

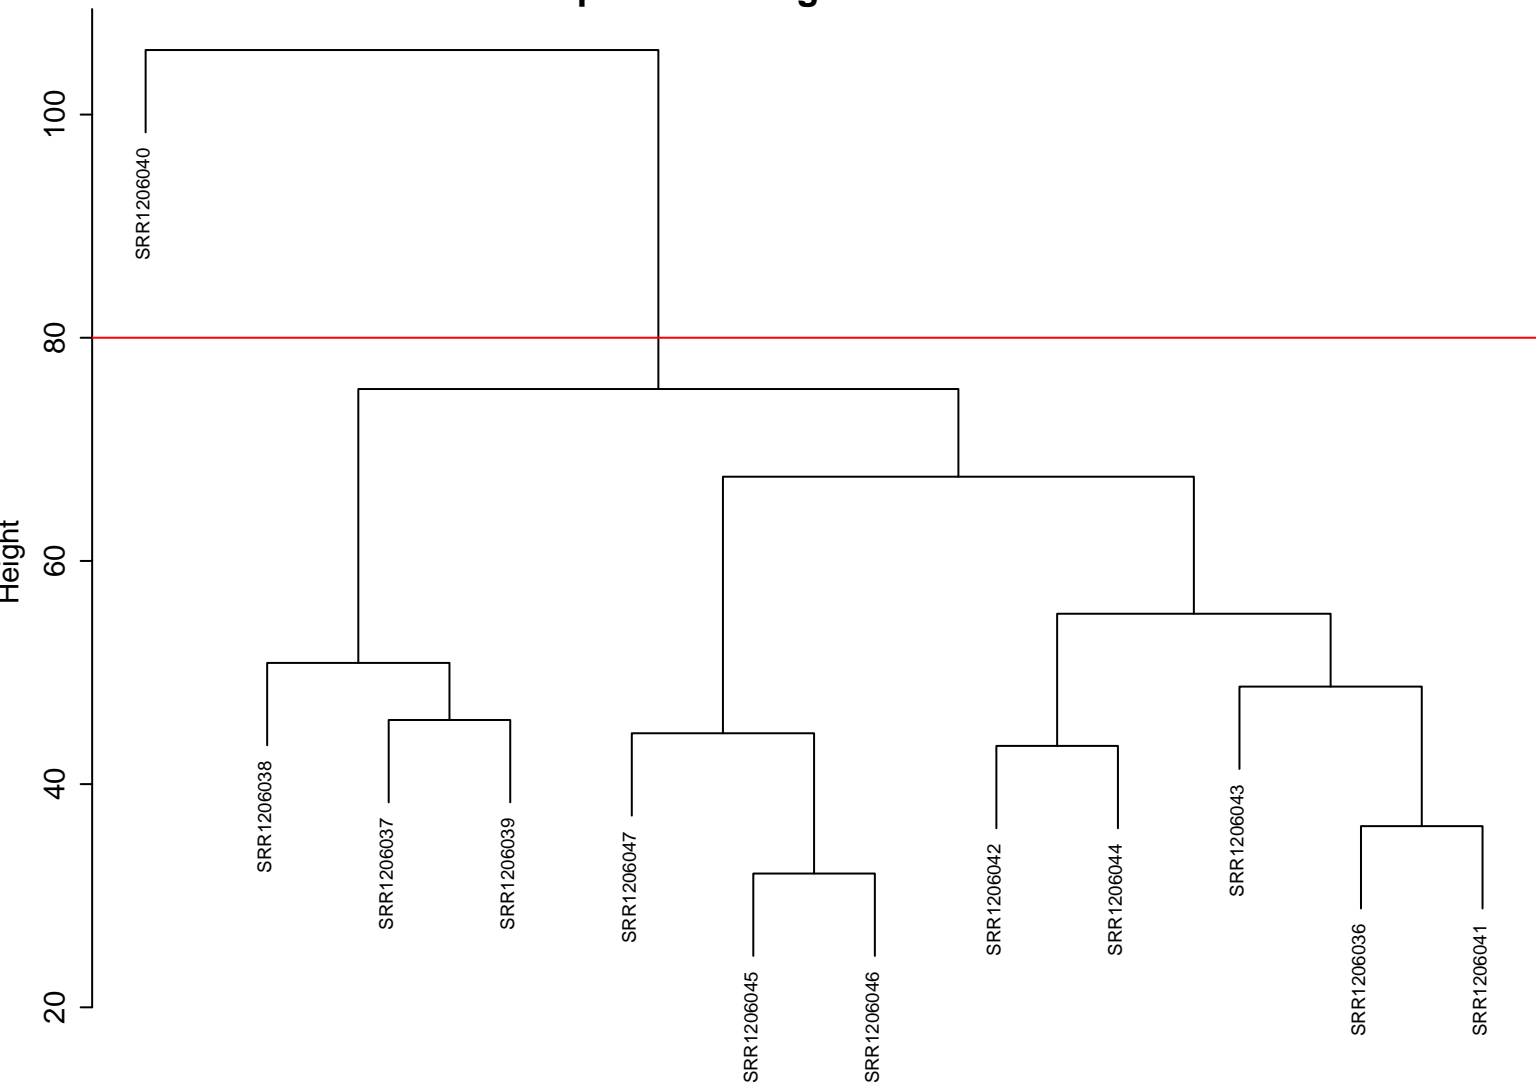

Supplement: Raw_data.zip [file Raw_data.zip]

**Module membership vs. gene significance**  
**cor=0.46, p=1.8e-07**

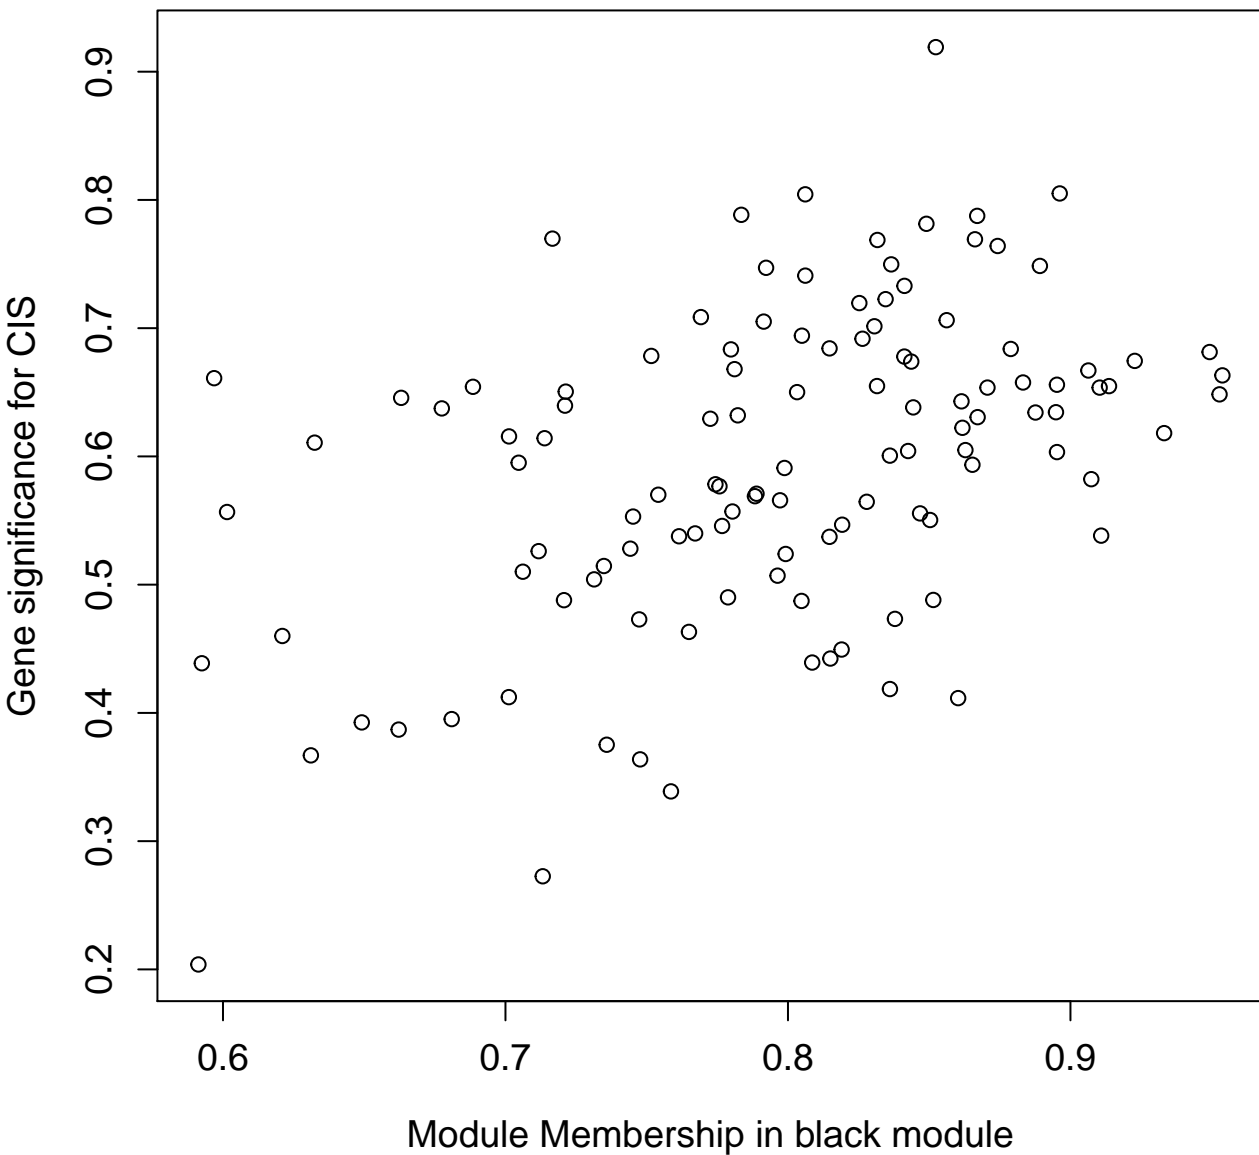

Supplement: Raw_data.zip [file Raw_data.zip]
